1 **BioLaboro: A bioinformatics system for detecting molecular assay signature erosion and**  
2 **designing new assays in response to emerging and reemerging pathogens**

3

4 Mitchell Holland<sup>1</sup>, Daniel Negrón<sup>1</sup>, Shane Mitchell<sup>1</sup>, Nate Dellinger<sup>1</sup>, Mychal Ivancich<sup>1</sup>, Tyler  
5 Barrus<sup>1</sup>, Sterling Thomas<sup>1</sup>, Katharine W. Jennings<sup>1</sup>, Bruce Goodwin<sup>2</sup>, and Shanmuga  
6 Sozhamannan<sup>2,3</sup>

7 <sup>1</sup>Noblis, Reston, VA, 20191, USA

8 <sup>2</sup> Defense Biological Product Assurance Office (DBPAO), Joint Program Executive Office for  
9 Chemical, Biological, Radiological and Nuclear Defense (JPEO-CBRND), Enabling  
10 Biotechnologies, Frederick, MD 21702, USA

11 <sup>3</sup>Logistics Management Institute, Tysons, VA 22102, USA

12 **Corresponding author:** Shanmuga Sozhamannan, Ph. D.

13 **E. mails for communication:**

14 [Shanmuga.Sozhamannan.ctr@mail.mil](mailto:Shanmuga.Sozhamannan.ctr@mail.mil); 301-619-8430

15 **Key words:** infectious diseases, preparedness, detection assays, next generation sequencing,  
16 biosurveillance, genome sequence, diagnostics, signature erosion, Ebolavirus, Bombali  
17 ebolavirus, BOMV, SARS-CoV-2, Real-time PCR assays

18

19

20

21

## 22 **Abstract**

23 **Background:** Emerging and reemerging infectious diseases such as the novel Coronavirus  
24 disease, COVID-19 and Ebola pose a significant threat to global society and test the public  
25 health community's preparedness to rapidly respond to an outbreak with effective diagnostics  
26 and therapeutics. Recent advances in next generation sequencing technologies enable rapid  
27 generation of pathogen genome sequence data, within 24 hours of obtaining a sample in some  
28 instances. With these data, one can quickly evaluate the effectiveness of existing diagnostics and  
29 therapeutics using *in silico* approaches. The propensity of some viruses to rapidly accumulate  
30 mutations can lead to the failure of molecular detection assays creating the need for redesigned  
31 or newly designed assays.

32 **Results:** Here we describe a bioinformatics system named BioLaboro to identify signature  
33 regions in a given pathogen genome, design PCR assays targeting those regions, and then test the  
34 PCR assays *in silico* to determine their sensitivity and specificity. We demonstrate BioLaboro  
35 with two use cases: Bombali Ebolavirus (BOMV) and the novel Coronavirus 2019 (SARS-CoV-  
36 2). For the BOMV, we analyzed 30 currently available real-time reverse transcription-PCR  
37 assays against the three available complete genome sequences of BOMV. Only two met our *in*  
38 *silico* criteria for successful detection and neither had perfect matches to the primer/probe  
39 sequences. We designed five new primer sets against BOMV signatures and all had true positive  
40 hits to the three BOMV genomes and no false positive hits to any other sequence. Four assays  
41 are closely clustered in the nucleoprotein gene and one is located in the glycoprotein gene.  
42 Similarly, for the SARS-CoV-2, we designed five highly specific primer sets that hit all 145  
43 whole genomes (available as of February 28, 2020) and none of the near neighbors.

44 **Conclusions:** Here we applied BioLaboro in two real-world use cases to demonstrate its  
45 capability; 1) to identify signature regions, 2) to assess the efficacy of existing PCR assays to  
46 detect pathogens as they evolve over time, and 3) to design new assays with perfect *in silico*  
47 detection accuracy, all within hours, for further development and deployment. BioLaboro is  
48 designed with a user-friendly graphical user interface for biologists with limited bioinformatics  
49 experience.

## 50 **Background**

51 Emerging and reemerging infectious diseases have serious adverse impacts on society  
52 with respect to lives lost and annual economic losses [1-5], as being witnessed currently in the  
53 COVID-19 outbreak caused by a novel Coronavirus, SARS-CoV-2. As of March 9, 2020, there  
54 have been 113,584 confirmed cases of COVID-19 around the globe and 3,996 deaths [6-8].  
55 Factors such as climate change, urbanization, zoonotic spillover, international travel, lack or  
56 breakdown of public health care systems, natural or man-made disasters, and pathogen evolution  
57 to name a few, contribute to infectious disease emergence and sustainment [2].

58 A unique challenge associated with emerging infectious diseases is rapidly identifying  
59 the etiological agent and developing or repurposing existing medical countermeasures (MCMs),  
60 including diagnostic assays, to curtail the spread of an outbreak. With respect to reemerging  
61 infectious diseases the challenge is to determine whether existing MCMs are effective or not, and  
62 in the latter case, develop or modify the MCMs in a timely manner. In some cases, the failure of  
63 existing MCMs can be accounted for by genetic drift and shift and the resulting altered genotypic  
64 and phenotypic profiles of the newly emergent pathogen. Ebolavirus is one such reemerging  
65 infectious disease agent that exhibits high degrees of genetic changes in every new outbreak.

66 Ebola virus disease (EVD) is one of the deadliest infectious diseases that continues to  
67 plague Central and Western Africa. It was discovered in 1976 when two consecutive outbreaks  
68 of fatal hemorrhagic fever occurred in different parts of Central Africa [9]. The first outbreak  
69 occurred in the Democratic Republic of the Congo (DRC, formerly Zaire) in a village near the  
70 Ebola River, which gave the virus its name [9]. Since 1976 more than 25 outbreaks have been  
71 recorded. The average case fatality ratio (CFR) for EVD is around 50% and varies from 25% to  
72 90% in past outbreaks [9]. From 2014 to 2016, the world witnessed the worst-yet EVD outbreak,  
73 which originated in Western Africa. That outbreak started in a rural setting of southeastern  
74 Guinea, and quickly spread like a wildfire to urban areas and across borders to the neighboring  
75 countries of Liberia and Sierra Leone [10]. In the end, the outbreak infected 28,616 people and  
76 killed 11,310 of the victims (CFR of approximately 39.5%) [11]. In the current Democratic  
77 Republic of the Congo outbreak that began in August 2018, as of March 4, 2020, a total of 3,444  
78 cases, total deaths 2,264 and 1,169 survivors have been reported [12].

79 Until recently, there was no approved vaccine or treatment for EVD although four  
80 experimental therapeutics, (Regeneron's monoclonal antibody REGN-EB3, mAb-114  
81 [Ridgeback Biotherapeutics], Remdesivir GS-5734 [Gilead] and ZMapp [MappBio  
82 Pharmaceutical] underwent clinical trials (the Pamoja Tulinde Maisha [PALM] study) during the  
83 current DRC outbreak [13]. On October 17, 2019, the Committee for Medicinal Products for  
84 Human Use granted a "conditional marketing authorization" for the Ebola Zaire vaccine  
85 ERVEBO by Merck Sharp and Dohme [14]. ERVEBO was reviewed under the European  
86 Medicines Agency's (EMA) accelerated assessment program. ERVEBO (v290) (Ebola Zaire  
87 Vaccine (rVSVΔG-ZEBOV-GP, live) is a genetically engineered, replication competent,

88 attenuated live vaccine that received approval from the U. S. Food and Drug Administration  
89 (FDA) on December 19, 2019 [15].

90           Ebolaviruses are one of three genera of filoviruses belonging to the Family *Filoviridae*,  
91 Cuevavirus and Marburgvirus being the other two. Filoviruses are non-segmented, negative-  
92 sense, single-stranded RNA viruses. Six species of Ebolaviruses have been described to date,  
93 Zaire (EBOV), Bundibugyo (BDBV), Sudan (SUDV), Tai Forest (TAFV), Reston (RESTV) and  
94 Bombali (BOMV). The prototypic viruses - EBOV, BDBV, SUDV and TAFV - have been  
95 associated with disease in humans [16, 17]. The RESTV causes disease in nonhuman primates  
96 and pigs [18, 19]. In a 2018 wildlife survey, BOMV RNA was recovered from insectivorous  
97 bats, but there are no known cases of human or animal disease caused by this species [20].

98           Research on EVD focuses on finding the virus' natural reservoirs and hosts from which  
99 spill over occurs, developing preventive measures such as vaccines to protect at-risk populations,  
100 and discovering therapies to improve treatment of infections. Biosurveillance data suggested that  
101 the reservoirs of ebolaviruses may be fruit and insect eating bats [21-24]. The new BOMV was  
102 identified in a biosurveillance project conducted in Sierra Leone to identify hosts of EBOV as  
103 well as any additional filoviruses that might be circulating in wildlife [20]. Oral and rectal swabs  
104 were collected from 535 animals (244 bats, 46 rodents, 240 dogs, 5 cats) from 20 locations in  
105 Sierra Leone in 2016. Of the 1,278 samples, five samples from three Little free-tailed bats and  
106 one Angolan free-tailed bat contained ebolavirus sequences. Two full genome sequences were  
107 assembled from two of the samples and they showed nucleotide identity of 55–59% and amino  
108 acid identity of 64–72% to other ebolaviruses [20]. Based on phylogenetic analyses of sequence  
109 data, it was determined that the genome was sufficiently distinct to represent the prototypic strain  
110 of a new species, Bombali Ebolavirus (BOMV) [20].

111 *In vitro* studies of the BOMV demonstrated that a recombinant vesicular stomatitis virus  
112 (rVSV) encoding the BOMV glycoprotein (GP) gene mediated virus entry into human host cells  
113 [20]. Entry and infection of rVSV–BOMV GP was also completely dependent on Niemann-Pick  
114 C1 (NPC1) protein, providing additional evidence that this is a universal receptor for filoviruses.  
115 Although not conclusive, these data indicated the potential for BOMV to infect humans. Given  
116 the high divergence from other Ebolaviruses, we examined whether existing real-time reverse-  
117 transcription PCR (rRT-PCR) assays for Ebolaviruses would detect the new BOMV.

118 Potential determinants of Ebolavirus pathogenicity in humans were identified by  
119 analyzing the differentially conserved amino acid positions called specificity determining  
120 positions (SDPs) between human pathogenic ebolaviruses and the non-pathogenic Reston virus  
121 [25]. Recently, this study was extended to include BOMV to assess its pathogenicity to humans  
122 [26]. At SDPs, BOMV shared the majority of amino acids (63.25%) with the human pathogenic  
123 Ebolaviruses. However, for two SDPs in viral protein 24 (VP24), which may be critical for the  
124 lack of Reston virus human pathogenicity, the BOMV amino acids match those of Reston virus.  
125 Thus, BOMV may not be pathogenic in humans [25, 26]. Nonetheless, rRT-PCR assays are  
126 important for biosurveillance of BOMV and other potential new variants in the wild.

127 While our study on the BOMV use case for assay design was ongoing, the world  
128 witnessed the emergence of a novel respiratory pneumonia disease (COVID-19) epidemic from  
129 Wuhan city, Hubei province, China. In the aftermath of its rapid global spread and devastating  
130 impact, on March 11, 2020, the WHO declared that COVID-19 can be characterized a pandemic  
131 threat [27]. COVID-19 was determined to be caused by a severe acute respiratory syndrome  
132 (SARS)-like corona virus (SARS-CoV-2) that quickly spread within Wuhan [28, 29] and crossed  
133 borders to >104 countries/territories/areas as of March 09, 2020 [7, 8, 30].

134 Using next generation sequencing, the whole genome sequence (WGS) of SARS-CoV-2  
135 are continuously being released and shared (306 complete genomes as of March 09, 2020) with  
136 the entire research community through Global Initiative on Sharing All Influenza Data (GISAID)  
137 [31]. The release of WGS allowed us to test the BioLaboro pipeline (described in this study) to  
138 evaluate currently used diagnostic assays and to rapidly design new assays.

139 In a previous study, we described a bioinformatics tool called PSET (PCR signature  
140 erosion tool) and used it to show *in silico*, confirmed with wet lab work, the effectiveness of  
141 existing Ebolavirus diagnostic assays against a large number of sequences available at that time  
142 [32]. The phrase “signature erosion” used here signifies potential false-positive or false-negative  
143 results in PCR assays due to mutations in the primers, probe, or amplicon target sequences (PCR  
144 signatures). Signature erosion could also mean failure of medical countermeasures; for example,  
145 a change in the genomic sequence resulting in an amino acid change that could potentially alter  
146 the efficacy of sequence-based therapeutics [33, 34].

147 In this study, we describe an expanded bioinformatics pipeline called BioLaboro in which  
148 we have integrated several tools: BioVelocity®, Primer3 and PSET for end-to-end analysis of  
149 outbreak pathogen genome sequences to evaluate existing PCR assay efficacy against the new  
150 sequences, and to identify unique signature regions (BioVelocity), design PCR assays to these  
151 regions (Primer3), and test the new assays’ efficacy (PSET) against current National Center for  
152 Biotechnology Information Basic Local Alignment Search Tool (BLAST) standard databases  
153 [35]. We have used the BOMV and SARS-CoV-2 sequences as proof of concept for BioLaboro  
154 to develop and evaluate new PCR assays *in silico*.

155

156

## 157 **Results**

### 158 **BioLaboro architecture**

159 BioLaboro is comprised of three algorithms - BioVelocity, Primer3, and PSET - which  
160 are built into a pipeline for *user-friendly* applications. The user has the option to launch one of  
161 four different job types: Signature Discovery, Score Assay Targets, Validate Assay, or New  
162 Assay Discovery. Each of the three algorithms can be run individually or together as a complete  
163 end-to-end pipeline (Figure 1). For the BOMV use case, in the first phase of the pipeline  
164 BioVelocity was used to analyze a set of genome sequences for unique regions that are both  
165 conserved and signature to the target sequences selected. This was achieved by splitting a chosen  
166 representative whole genome sequence into sliding 50 base pairs (bps) k-mers. Each k-mer was  
167 then scanned against all target sequences to determine conservation. Conserved k-mers were then  
168 elongated based on overlaps and formed into contigs. These contigs were then split into k-mers  $\leq$   
169 250 bps and scanned against all non-target sequences to determine specificity. All passing  
170 sequences were then elongated based on overlaps and the signature contigs were passed to the  
171 next step in the pipeline. Primer3 was then used to evaluate the signature contigs to identify  
172 suitable primers and probes for assay development. Primer3 was run in parallel against all  
173 signatures and the output was ranked by penalty score in ascending order. The top five best  
174 primer sets were passed along to the final step in the pipeline, PSET. In this step the primer sets  
175 were run through a bioinformatics pipeline which aligned the sequences against large public  
176 sequence databases from NCBI using BLAST and GLSEARCH [36] to determine how well each  
177 assay correctly aligned to all target sequences while excluding off-target hits.

178 Figure 1. BioLaboro- New Assay Discovery pipeline.



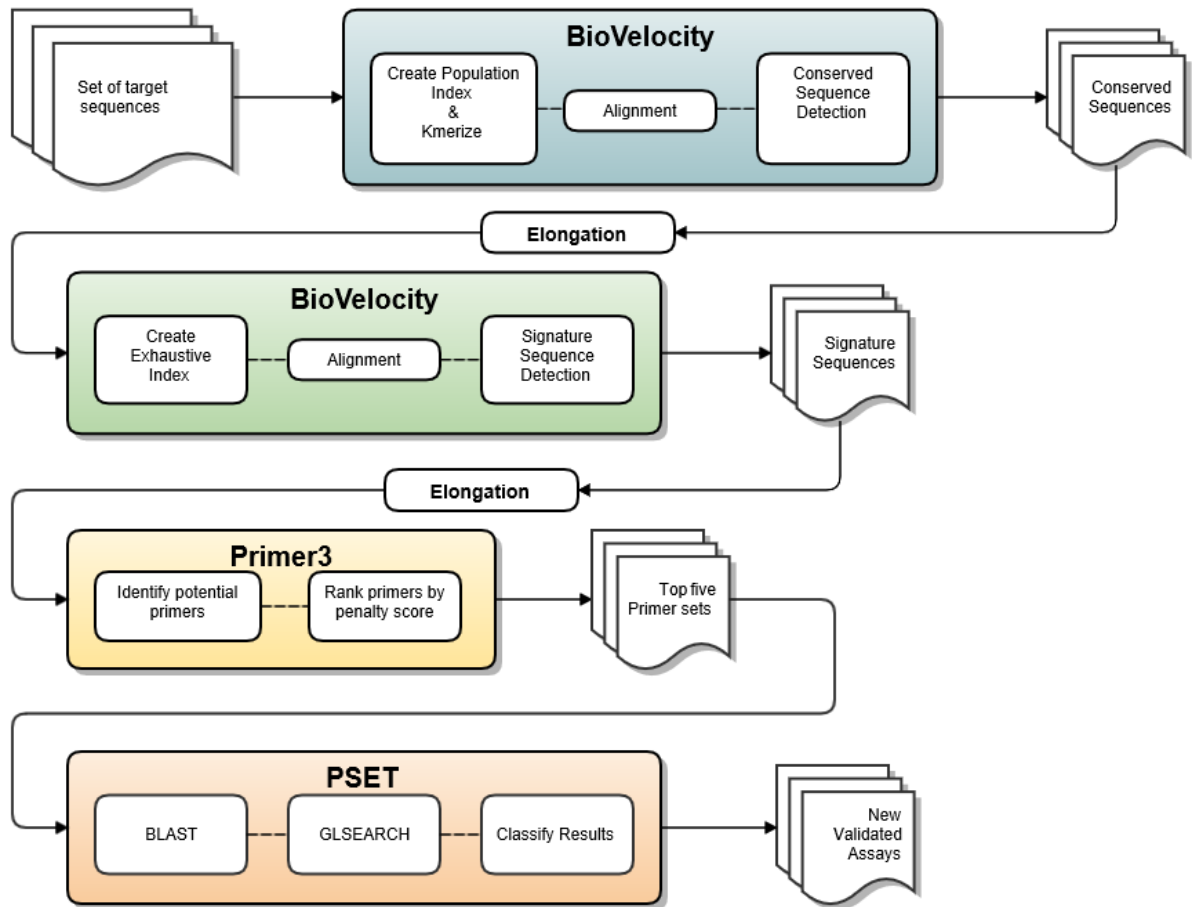

179

## 180 Performance assessment of currently available EBOV PCR assays on BOMV using PSET

181 The phylogenetic classification criteria for filoviruses were reported to be 64–77%  
182 similarity for species and 41–50% for genera, based on BLAST alignment results [37].  
183 Compared to other ebolaviruses, the BOMV showed 55–59% nucleotide identity, 64–72% amino  
184 acid identity [20]. Given the sequence diversity, we assessed if the current diagnostic assays  
185 were effective against BOMV. We compared the current Ebola assay signatures against the three  
186 available complete genome sequences of BOMV (NCBI Accession numbers: MF319185.1,  
187 MF319186.1, and MK340750.1). Of the 30 Ebola assays examined (assay details in reference  
188 [32]), only two met our *in silico* criteria for successful detection (90% identity over 90% of the  
189 length for all primers and probe sequences in the amplicon). Of the two assays that did meet

190 detection criteria for BOMV, neither had perfect matches to the primer sequences. The primer set  
 191 match percentages (the average identity of all primers/probes) for all 30 Ebola assays against the  
 192 three BOMV complete genomes are shown in the heat map (Table 1). The two assays which pass  
 193 the *in silico* criteria are shown in green while the matches in red indicate failure or no alignment.

194 Table 1. Heat map of PSET results of Ebola assays against BOMV sequences

| Assay                     | MF319186.1 | MK340750.1 | MF319185.1 |
|---------------------------|------------|------------|------------|
| EBO_GP                    | 94.21      | 94.21      | 94.21      |
| EBO1_2                    | 72.50      | 75.00      | 72.50      |
| EBO3_4                    | 74.34      | 74.34      | 74.34      |
| EBOGP                     | 78.41      | 76.75      | 78.41      |
| Ebola_Bundibugyo_MGB      | None       | None       | None       |
| Ebola_Bundibugyo_TM       | None       | None       | None       |
| Ebola_Ivory_Coast_MGB     | None       | None       | None       |
| Ebola_Ivory_Coast_TM      | 72.22      | 69.44      | 70.83      |
| Ebola_Reston_MGB          | None       | None       | None       |
| Ebola_Reston_TM           | None       | None       | None       |
| Ebola_Sudan_MGB           | 80.78      | 80.78      | 82.17      |
| Ebola_Sudan_TM            | None       | None       | None       |
| EboZNP                    | 75.66      | 76.01      | 75.66      |
| ENZ                       | 72.41      | 69.22      | 72.41      |
| Filo_AB                   | 73.48      | 73.48      | 73.48      |
| GAB_1                     | 78.57      | 78.57      | 78.57      |
| KGH                       | None       | None       | None       |
| Kulesh_MGB                | 71.29      | None       | 71.29      |
| Kulesh_TM                 | 74.74      | 74.74      | 74.74      |
| NGDS_Primary_amplicon     | None       | 61.39      | None       |
| NGDS_Secondary_amplicon   | 66.91      | None       | 66.91      |
| pan_Ebola_Assay_MGB_EBOV  | 76.74      | 76.74      | 76.74      |
| pan_Ebola_Assay_MGB_RESTV | 77.55      | 79.07      | 77.55      |
| pan_Ebola_Assay_MGB_SUDV  | 70.63      | 72.30      | 70.63      |
| PanFiloL1_2               | 85.55      | 85.55      | 85.55      |
| PanFiloL3_4               | 96.30      | 96.30      | 96.30      |
| Reston                    | 75.49      | 75.49      | 77.67      |
| Sudan                     | None       | None       | None       |
| ZAI_NP                    | 80.59      | 80.59      | 80.59      |
| ZebovGP                   | None       | None       | None       |

195

196 Table 1 Legend: The average primer set percent identity matches for thirty current Ebola assays  
197 tested against the three BOMV genomes. Cells in green have an average primer identity over  
198 90% which indicates likely primer binding while red cells have below 90% average identity or  
199 no alignment at all, indicating likely primer binding failure.

200 Even the two assays that passed *in silico* criteria did not have perfect matches raising the  
201 possibility that these assays may fail in wet lab testing due to mismatches against currently  
202 available BOMV genomic sequences. Hence, as described below, we designed new assays using  
203 the BioLaboro platform.

#### 204 **Discovery of potential new BOMV assays using BioLaboro end-to-end pipeline**

205 Using BioLaboro we ran a New Assay Discovery job to discover new BOMV signatures  
206 and determine their potential for accurate detection using PSET. In the first phase, BioVelocity  
207 was used to search for conserved and signature regions within the selected genomes. We selected  
208 the organism of interest by searching for “Bombali ebolavirus” from the database and selecting  
209 the three available complete genomes. The MF319185.1 genome was used as the algorithmic  
210 reference sequence as it is the same one that NCBI selected for the RefSeq database (Genbank  
211 ID: NC\_039345.1). The algorithmic reference sequence was first split into k-mers of 50 bps each  
212 using a sliding window of 1 bp, which amounts to 18,994 k-mers to be evaluated with  
213 BioVelocity’s conserved sequence detection algorithm. BioVelocity found 27% (5,237) of these  
214 k-mers to be conserved in all three of the BOMV genomes. The conserved k-mers were then  
215 evaluated to determine overlapping segments and were combined into 120 conserved contigs.  
216 These contigs were next evaluated with BioVelocity’s signature sequence detection algorithm.  
217 The contigs were split into signatures with a max size of 250 bps (longer contigs were split into  
218 250 k-mers with a step size of 1). The conserved k-mer sequences were evaluated against

219 563,843 complete genomes and plasmids from the NCBI GenBank repository. There were 291 k-  
 220 mers sequences found to be signatures to BOMV. The signatures were then evaluated to  
 221 determine overlapping reads and combined back into 119 signature contigs. Metrics for the  
 222 BioVelocity run in phase one are shown in Table 2.

223 Table 1. BioVelocity run statistics for BOMV.

| Type      | Contigs | Total Bases | Average Length | Median Length | Genome Coverage |
|-----------|---------|-------------|----------------|---------------|-----------------|
| Conserved | 120     | 11,117      | 93             | 81            | 58.3%           |
| Signature | 119     | 11,046      | 93             | 81            | 58.0%           |

224  
 225 Table 2 Legend. Total number of conserved and signature contigs along with total bases, average  
 226 sequence length, median sequence length, and percent coverage of the BOMV genome

227 In the second phase, Primer3 was used to identify potential primer pairs and probes for  
 228 generating new PCR detection assays. For the BioLaboro pipeline, Primer3 is used to assess the  
 229 suitability of a sequence to primer creation and generates viable primers which cover the  
 230 identified signature regions. There were 151 primer sets created from the signatures run through  
 231 Primer3 and assigned a penalty score to facilitate comparison of the results. The top five primer  
 232 sets, by lowest penalty score (Table 3), were formatted and sent to the final step for validation  
 233 using PSET.

234 Table 3. Primer3 identified PCR assays for BOMV.

| Identifier   | Targets | Definition                                                                                                                                                                                                                                       | Penalty Points |
|--------------|---------|--------------------------------------------------------------------------------------------------------------------------------------------------------------------------------------------------------------------------------------------------|----------------|
| signatures.4 | 2010960 | [AGCTGGACCACTTAGGCCTA]GACACAAAAGAAAAGGAAATA<br>TTAATGAATTTCCATCAACGGAAAAATGAGATTAGTTTCCAGC<br>AAACAAATGCAATGGTGTCCCTTCGCAAGGAGAGACTAGCAA<br>AACTAACAGA(AGCTATTGCCGCTGCATCAGCC)CAAAGAGAG<br>AGAGGCTACTACGACGATGACAATGAA[ATTCCGTTTCCAGGC<br>CCAAT] | 0.083          |

|               |         |                                                                                                                                                                                                                                                                                                                                    |       |
|---------------|---------|------------------------------------------------------------------------------------------------------------------------------------------------------------------------------------------------------------------------------------------------------------------------------------------------------------------------------------|-------|
| signatures.12 | 2010960 | [TGAAGCTGGAGAATGGGCTG]AGAATTGCTACAATCTAGAGATCAAGAAGCCTGATGGGAGTGAGT(GCTTACCGATGGCCCCAGAGG)GGAT[CCGTGGCTTCCCTAGATGTC]                                                                                                                                                                                                               | 0.139 |
| signatures.5  | 2010960 | [AAGCAGCTGCAGCAATATGC]TGAAACACGTGAGCTGGACCACTTAGGCCTAGACACAAAAGAAAAGGAAATATTAATGAATTCATCAACGGAAAAATGAGATTAGTTTCCAGCAAACAAATGCAATGGTGTCCCTTCGCAAGGAGAGACTAGCAAACAACTAACAGA(AAGCTATTGCCGCTGCATCAGCC)CAAAGAGAGAGAGGCTACTACGACGATGACAATGAA[ATTCCGTTTCCAGGCCCAAT]                                                                       | 0.143 |
| signatures.6  | 2010960 | [ATTCCGTTTCCAGGCCCAAT]CAATGACAATGATGACCAAGATCAGCATGTTGATG(ACCCAACAGATACCCAGGACACA)ACAATTCAGACATTGTTCG[TAGACCCAGACGATGGAGGG]                                                                                                                                                                                                        | 0.147 |
| signatures.7  | 2010960 | [AGCTGGACCACTTAGGCCTA]GACACAAAAGAAAAGGAAATA TTAATGAATTTCCATCAACGGAAAAATGAGATTAGTTTCCAGCAAACAAATGCAATGGTGTCCCTTCGCAAGGAGAGACTAGCAA AACTAACAGA(AGCTATTGCCGCTGCATCAGCC)CAAAGAGAGAGAGGCTACTACGACGATGACAATGAAATTCCGTTTCCAGGCC CAATCAATGACAATGATGACCAAGATCAGCATGTTGATGACCC AACAGATACCCAGGACACAACAATTCCAGACATTGTTCG[TAGACCCAGACGATGGAGGG] | 0.148 |

235

236 Table 3 Legend. The five new assays identified by Primer3 ranked by lowest penalty score. The  
 237 Identifier column is an automated ID generated from the pipeline, the Targets column is the  
 238 Taxonomy ID for BOMV, the Definition column contains the amplicon sequence with the  
 239 primers in brackets (orange) and the probe in parentheses (blue), and the Penalty Points column  
 240 contains the score generated after taking into account primer design parameters.

241 The signature regions identified by BioVelocity and the five new assays selected by  
 242 Primer3 were mapped to the BOMV genome (Figure 2). As shown, the four assays are clustered  
 243 in the nucleoprotein (NP) gene and one is in the glycoprotein (GP) gene. The signature segments  
 244 (blue) indicate that there are many potential assay regions throughout the genome.

245 Figure 2. Linear map of BOMV genome.

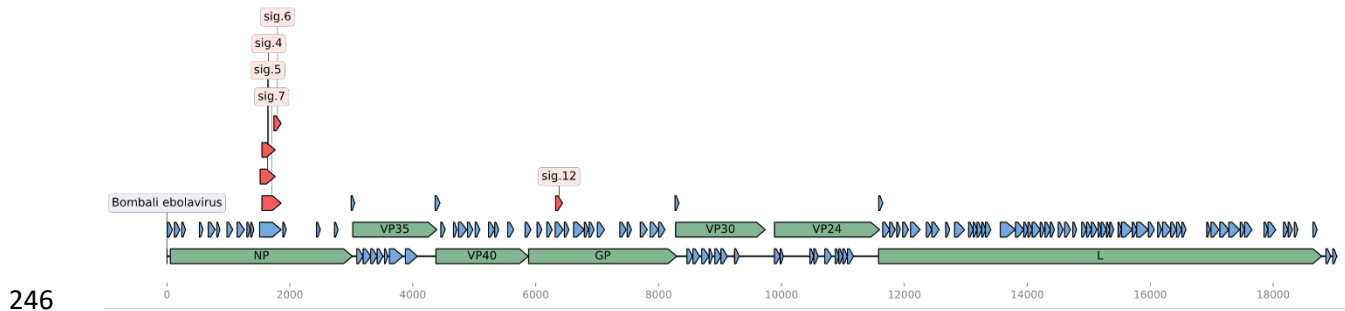

247 Figure 2 Legend: Linear map of the BOMV genome with annotations. The BOMV genes are  
248 colored in green, the signature segments are colored in blue, and the new assays are colored in  
249 red. The figure was created using the DNA Features Viewer Python library [38].

250 In the third phase, PSET was used to test the five newly designed assays identified by  
251 Primer3 *in silico* against publicly available sequences. PSET was used to analyze the primers and  
252 probes in the new assays using bioinformatics tools to identify potential false-positive and false-  
253 negative matches to NCBI's BLAST nucleotide sequence repositories (nt, gss, and env\_nt)  
254 comprised of over 220 million sequences (as of last update in September 2019). BLAST+ was  
255 used to compare the assay amplicon sequences against these sequence repositories to identify  
256 matches. These matches were then used to create a custom library of sequences for GLSEARCH,  
257 a global-local sequence comparison tool in the FASTA suite of programs, which was used to  
258 search for the individual primers and probes. The resulting output was then processed and  
259 filtered based on pre-defined hit acceptance criteria. These criteria require that the assay  
260 components all hit to 90% identity over 90% of the component length, primer pairs were on  
261 opposite strands, and the total amplicon size was no greater than 1000 bps. The results were then  
262 validated by comparing the hits to the target NCBI Taxonomy identifier (ID), and true and false  
263 matches were reported. PSET results confirmed that the top five primer sets had true positive hits  
264 to all three BOMV genomes and no false positive hits to any other organism (Table 4).

265 Table 4. PSET results of BOMV assays

| Identifier    | Targets | TP | TN   | FP | FN |
|---------------|---------|----|------|----|----|
| signatures.4  | 2010960 | 3  | 1647 | 0  | 0  |
| signatures.12 | 2010960 | 3  | 1678 | 0  | 0  |
| signatures.5  | 2010960 | 3  | 1678 | 0  | 0  |
| signatures.6  | 2010960 | 3  | 11   | 0  | 0  |
| signatures.7  | 2010960 | 3  | 1164 | 0  | 0  |

266  
267 Table 4 Legend: True positive (TP: All assay components hit with  $\geq 90\%$  identity over  $\geq 90\%$   
268 of the component length to the correct target), true negative (TN: Partial hit to assay amplicon  
269 but one or more assay components hit with  $< 90\%$  alignment to an incorrect target), false positive  
270 (FP: All assay components hit with  $\geq 90\%$  identity over  $\geq 90\%$  of the component length to an  
271 incorrect target), and false negative (FN: Partial hit to assay amplicon but one or more assay  
272 components hit with  $< 90\%$  alignment to the correct target) counts for each of the five new  
273 BOMV assays tested. The targets column is the NCBI Taxonomy ID of the target sequence,  
274 BOMV.

275 There are a high number of true negative (TN) results for 4 of 5 assays due to the  
276 similarity of the amplicon sequences with Zaire ebolavirus although these TNs are not expected  
277 to produce PCR positive results in wet lab experiments.

#### 278 **Discovery of potential SARS-CoV-2 assays using BioLaboro end-to-end pipeline**

279 Using BioLaboro, we ran a New Assay Discovery job to discover SARS-CoV-2  
280 signatures and determine their potential for true positive viral detection. In the first phase,  
281 BioVelocity was used to search for conserved and signature regions within the selected genomes.  
282 Ninety six complete SARS-CoV-2 whole genome sequences were downloaded from the GISAID  
283 and uploaded to BioLaboro as a custom database. These 96 genomes were used as our reference  
284 set and EPI\_ISL\_404253 (Genbank ID: MN988713.1) was used as the algorithmic reference

285 sequence. The algorithmic reference sequence was first split into k-mers of 50 bps each using a  
286 sliding window of 1 bp, which amounted to 29,833 k-mers to be evaluated with the conserved  
287 sequence detection algorithm. BioVelocity found 79% (23,542) of these k-mers to be conserved  
288 in all 96 of the SARS-CoV-2 genomes. The conserved k-mers were then evaluated to determine  
289 overlapping segments and were combined into 96 conserved contigs. These contigs were next  
290 evaluated with BioVelocity's signature sequence detection algorithm. The contigs were split into  
291 signatures with a max size of 250 bps (longer contigs were split into 250 k-mers with a step size  
292 of 1). The conserved k-mer sequences were evaluated against 563,941 complete genomes and  
293 plasmids from the NCBI GenBank repository. There were 11,152 sequences found to be  
294 signature to SARS-CoV-2. The signatures were then evaluated to determine overlapping reads  
295 and combined back into 91 signature contigs. Metrics for the BioVelocity run in phase one are  
296 shown in Table 5.

297 Table 5. BioVelocity run statistics for SARS-CoV-2.

| Type      | Contigs | Total Bases | Average Length | Median Length | Genome Coverage |
|-----------|---------|-------------|----------------|---------------|-----------------|
| Conserved | 96      | 28,246      | 294            | 221           | 94.5%           |
| Signature | 91      | 27,888      | 306            | 241           | 93.0%           |

298  
299 Table 5 Legend: Total number of conserved and signature segments along with total bases,  
300 average sequence length, median sequence length, and percent coverage of the SARS-CoV-2  
301 genome.

302 In the second phase, Primer3 was used to identify potential primer pairs and probes for  
303 generating new PCR detection assays as described above for BOMV. There were 330 primer  
304 sets created from the signatures which were assigned a penalty score to facilitate comparison of  
305 the results. Primer sets were sorted by lowest penalty score and five potential assays were chosen



306 manually in order to distribute potential candidates across the genome. These assays were then  
 307 formatted and sent to the final step for validation using PSET. Primer sets sent to PSET are  
 308 shown in Table 6.

309 Table 6. Primer3 identified assays for SARS-CoV-2.

| Identifier    | Targets | Definition                                                                                                                                                                                                                                                                                                                                                                                                          | Penalty Points |
|---------------|---------|---------------------------------------------------------------------------------------------------------------------------------------------------------------------------------------------------------------------------------------------------------------------------------------------------------------------------------------------------------------------------------------------------------------------|----------------|
| signatures.12 | 2697049 | [ACGGCAGTGAGGACAATCAG]ACAACACTACTATTCAAACAATT<br>GTTGAGGTTCAACCTCAATTAGAGATGGAACCTACACCAGTT<br>GTCAGACTATTGAAGTGAATAGTTTTAGTGGTTATTTAAAAC<br>TACTGACAATGTATACATTA AAAAATGCAGACATTGTGGAAG<br>AAGCTAAAAAGGTA AAAA(CCAACAGTGGTTGTTAATGCAGCC<br>A)ATGTTTACCTTAA[ACATGGAGGAGGTGTTGCAG]                                                                                                                                   | 0.074          |
| signatures.40 | 2697049 | [GCCGCTGTTGATGCACACTATG]TGAGAAGGCATTA AAAATATTT<br>GCCTATAGATAAATGTAGTAGAATTATACCTGC(ACGTGCTCG<br>TG TAGAGTGT TTTTGAT)AAATTCAAAGTGAATTCAACATTAGA<br>ACAGTATGTCTTTTGTACTGTAA[ATGCATTGCCTGAGACGAC<br>A]                                                                                                                                                                                                               | 0.065          |
| signatures.42 | 2697049 | [TGTACGTGCATGGATTGGCT](TCGATGTCGAGGGGTGTCATG<br>CT)ACTAGAGAAGCTGTTGGTACCAATTTACCTTTACAGCTAG<br>GTTTTTCTACAGGTGTTAACCTAGTTGCTGTACCTACAGGTTA<br>TGTTGATACACCTAATAATACAGATTTTTCCAGAGT[TAGTGC<br>TAAACCACCGCCTG]                                                                                                                                                                                                        | 0.072          |
| signatures.44 | 2697049 | [CAGGCACCTACACACCTCAG]TGTTGACACTAAATTCAA AAC<br>TGAAGGTTTATGTGTTGACATACCTGGCATACTAAGGACAT<br>GACCTATAGAAGACTCATCTCTATGATGGGTTTTAAAATGAA<br>TTATCAAGTTAATGGTTACCCTAACATGTTTATCACCCGCGAA<br>GAAGCTATAAGACATGTACGTGCATGGAT(TGGCTTCGATGTC<br>GAGGGGTGT)CATGCTACTAGAGAAGCTGTTGGTACCAATTA<br>CCTTTACAGCTAGGTTTTTCTACAGGTGTTAACCTAGTTGCTG<br>TACCTACAGGTTATGTTGATACACCTAATAATACAGATTTTTTC<br>CAGAGT[TAGTGTCTAAACCACCGCCTG] | 0.074          |
| signatures.57 | 2697049 | [TGCAGATGCTGGCTTCATCA]AACAAATATGGTGATTGCCTTG<br>GTGATATTGCTGCTAGAGACCTCATTTGTGCACAAAAGTTTA(<br>ACGGCCTTACTGTTTTGCCACCT)TTGCTCACAGATGAAATGA<br>TTGCTCAATACACTT[CTGCACTGTTAGCGGGTACA]                                                                                                                                                                                                                                 | 0.073          |

310  
 311 Table 6 Legend: The five new assays identified by Primer3 ranked by lowest penalty score. The  
 312 Identifier column is an automated ID generated from the pipeline, the Targets column is the  
 313 Taxonomy ID for SARS-CoV-2, the Definition column contains the amplicon sequence with the  
 314 primers in brackets (orange) and the probe in parentheses (blue), and the Penalty Points column  
 315 contains the score generated after taking into account primer design parameters.

316 The five new assays were mapped to the SARS-CoV-2 genome presented below (Figure 3). This  
317 figure shows that four assays are in the ORF1ab and one is located in the spike (S) gene. By  
318 comparison, the CDC and Corman group assays are clustered primarily at the 3' end of the  
319 genome in the envelope (E) and nucleocapsid phosphoprotein (N) genes.

320 Figure 3. Linear map of SARS-CoV-2.

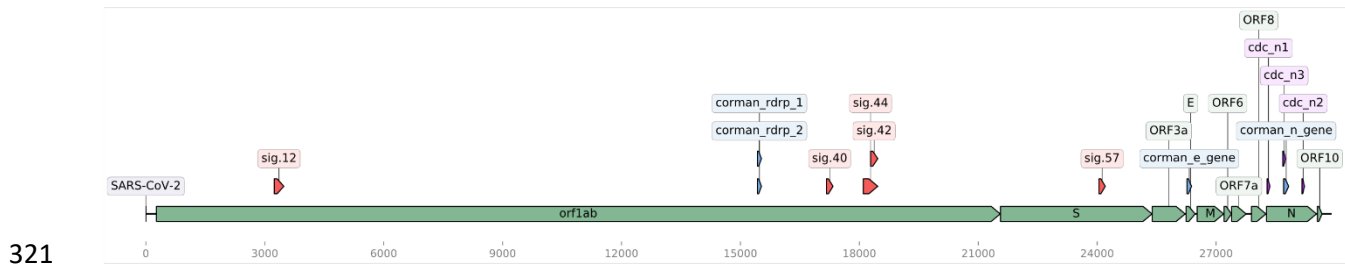

322 Figure 3 Legend. A linear map of the SARS-CoV-2 genome with annotations. The genes and  
323 open reading frames (ORFs) are colored in green and the new assays are colored in red, Corman  
324 assays (blue), CDC assays (purple), and assays discovered in this study (red). The figure was  
325 created using the DNA Features Viewer Python library [36].

326 In the third phase, PSET was used to test the five newly designed assays identified by  
327 Primer3 *in silico* against publicly available sequences as described above for BOMV signatures.  
328 The results were then validated by comparing the hits to the target NCBI Taxonomy identifier  
329 (ID), and true and false matches were reported. PSET confirmed that the top five primer sets had  
330 true positive hits to all 145 (SARS-CoV-2) genomes (as of February 28, 2020) and no false  
331 positive hits to any other organism. An additional table lists the identifiers and metadata for these  
332 145 complete genome sequences generated from human samples and not from other sources such  
333 as bat or pangolin [see Additional Table 2]. Results are shown alongside assays from CDC and  
334 Corman et al. [39, 40] (Table 7).

335 Table 7. PSET results of SARS-CoV-2 PCR assays.

| Identifier    | Targets | TP  | TN   | FP  | FN |
|---------------|---------|-----|------|-----|----|
| signatures.12 | 2697049 | 145 | 2    | 0   | 0  |
| signatures.40 | 2697049 | 145 | 316  | 0   | 0  |
| signatures.42 | 2697049 | 145 | 275  | 0   | 0  |
| signatures.44 | 2697049 | 145 | 277  | 0   | 0  |
| signatures.57 | 2697049 | 145 | 359  | 0   | 0  |
| cdc_n1        | 2697049 | 145 | 284  | 0   | 0  |
| cdc_n2        | 2697049 | 145 | 282  | 0   | 0  |
| cdc_n3        | 2697049 | 145 | 14   | 273 | 0  |
| corman_e_gene | 2697049 | 144 | 4    | 283 | 1  |
| corman_n_gene | 2697049 | 145 | 22   | 266 | 0  |
| corman_rdrp_1 | 2697049 | 145 | 2957 | 420 | 0  |
| corman_rdrp_2 | 2697049 | 145 | 2853 | 52  | 0  |

336  
337 Table 7 Legend: True positive (TP: All assay components hit with  $\geq 90\%$  identity over  $\geq 90\%$   
338 of the component length to the correct target), true negative (TN: Partial hit to assay amplicon  
339 but one or more assay components hit with  $< 90\%$  alignment to an incorrect target), false positive  
340 (FP: All assay components hit with  $\geq 90\%$  identity over  $\geq 90\%$  of the component length to an  
341 incorrect target), and false negative (FN: Partial hit to assay amplicon but one or more assay  
342 components hit with  $< 90\%$  alignment to the correct target) counts for each of the five new  
343 SARS-CoV-2 assays tested. The targets column is the NCBI Taxonomy ID of the target  
344 sequence, SARS-CoV-2.

345 There are a high number of true negative (TN) results for 4 of 5 assays due to the  
346 similarity of the amplicon sequences with SARS coronavirus near neighbors. The FP results  
347 from some Corman and CDC assays are due to near neighbor hits since these assays are pan  
348 assays. The one FN identified for corman\_e\_gene is to sequence EPI\_ISL\_410486 (Additional  
349 Table 2) which contains a large stretch of Ns over the majority of the amplicon sequence (80%)  
350 which is likely due to missing sequences.

351 We also tested the SARS-CoV-2 assays using PSET on near neighbor sequences that  
352 were generated during this outbreak, such as the bat and pangolin sequences. As expected the  
353 analyses showed a range of TP from pan assays, FN results due to sequence divergence (Table  
354 8).

355 Table 8. PSET results of SARS-CoV-2 PCR assays against bat and pangolin SARS-CoV  
356 sequences.

| Identifier     | Targets | TP | TN | FP | FN |
|----------------|---------|----|----|----|----|
| signatures.12  | 2697049 | 0  | 0  | 0  | 8  |
| signatures.40  | 2697049 | 1  | 0  | 0  | 7  |
| signatures.42  | 2697049 | 3  | 0  | 0  | 5  |
| signatures.44  | 2697049 | 2  | 0  | 0  | 6  |
| signatures.57  | 2697049 | 1  | 0  | 0  | 7  |
| cdc_n1         | 2697049 | 3  | 0  | 0  | 5  |
| cdc_n2         | 2697049 | 1  | 0  | 0  | 7  |
| cdc_n3         | 2697049 | 1  | 0  | 0  | 7  |
| corman_e_gene  | 2697049 | 8  | 0  | 0  | 0  |
| corman_n_gene_ | 2697049 | 2  | 0  | 0  | 6  |
| corman_rdrp_1  | 2697049 | 8  | 0  | 0  | 0  |
| corman_rdrp_2  | 2697049 | 3  | 0  | 0  | 6  |

357

358 Table 8 Legend: TP, TN, FP and FN definitions are similar to Table 7.

## 359 Discussion

360 Since its discovery in 2016, BOMV RNA has been detected in oral and rectal swabs as  
361 well as internal organs of *Mops condylurus* and *Chaerephon pumilus* bats in Sierra Leone, Kenya  
362 and Guinea [20, 41, 42]. These data add to the body of evidence suggesting that bats are a  
363 reservoir for filoviruses. However, these did not conclusively link the presence of viral RNA in  
364 bats to human infections with filoviruses. The discovery of BOMV in bats residing near and in  
365 human dwellings and residential areas further highlights the gaps in knowledge about ebolavirus

366 diversity and ecology. Given these gaps and the human and economic impacts of ebolavirus  
367 disease, there is an ongoing need for ebolavirus biosurveillance and further characterization of  
368 BOMV. Availability of efficient viral RNA detection assays is critical for bio surveillance of  
369 these reservoirs.

370       Based on *in silico* analyses, we determined that current EBOV assays could potentially  
371 fail to detect BOMV sequences, and thus there is a need for BOMV specific assays. Using  
372 BioLaboro we rapidly designed and evaluated new, more specific assays. An advantage of  
373 BioVelocity is that the end user obtains results quickly with high confidence that the output of  
374 conserved and unique signature regions are accurate and not based on heuristics and  
375 probabilities. Additionally, Primer3 allows an end user to determine which signatures yield the  
376 best primers and probes, based on an objective penalty scoring system. PSET tests the PCR  
377 assays *in silico* against the latest versions of public sequence repositories, including newly added  
378 strain genomes, to validate that the primers and probes match only to their intended targets.  
379 BioLaboro's easy-to-use Graphical User Interface (GUI) provides full functionality for  
380 submitting a new job, viewing the current job queue, checking results from previously completed  
381 jobs, and exploring the system database management and settings. The dedicated large RAM  
382 system easily supports multiple users with discrete logins and rapid operations. Moreover, the  
383 user-friendly GUI allows scientists without command-line experience to design and evaluate an  
384 assay for immediate wet lab testing.

385       Due to the relative novelty of BOMV there are currently only three complete genomes  
386 available from NCBI. As more samples are identified and sequenced the genetic diversity will  
387 likely increase. During the 2014 - 2016 Western African EBOV outbreak, rapid accumulation of  
388 inter- and intra-host genetic variations were observed [43]. Since many of the nucleotide

389 mutations altered protein sequences, it became apparent that the changes should be monitored for  
390 impacts on diagnostics, vaccines, and therapies critical to outbreak response. In an earlier study  
391 conducted to decipher the impact of the then-available diagnostics, we determined that many of  
392 the real-time reverse transcription PCR (rRT-PCR) assays that were in use during that outbreak  
393 identified regions outside of those that BioVelocity selected as unique to EBOV, SUDV, and  
394 RESTV [32]. In another study, signature erosion of diagnostic assays was identified during the  
395 2018 outbreak in North Kivu and Ituri Provinces of the Democratic Republic of the Congo [44].  
396 Using the *in silico* methods described here, only two of the 30 EBOV rRT-PCR assays evaluated  
397 against BOMV target sequences met our criteria for successful detection and neither showed  
398 perfect matches. For ongoing biosurveillance, we recommend wet lab testing and validation of  
399 the rRT-PCR assays described here to ensure detection of BOMV.

400 We also tested the BioLaboro pipeline with available SARS-CoV-2 viral genomes and  
401 rRT-PCR assays. We identified five signature sequences distributed across the genome and in  
402 different regions than those of the CDC or German group [39, 40]. There are seven assays  
403 currently in use (3 CDC and 4 German) for SARS-CoV-2 diagnostics and they all produced true  
404 positive results against the human-derived sample sequences without any signs of signature  
405 erosion. A few whole genome sequences that showed false negative results were from  
406 environmental samples (Bat and Pangolin origin) indicating that the diagnostic assays are  
407 specific for human isolates. The assays that produced true positive results were pan assays. The  
408 lack of signature erosion is in agreement with the whole genome sequence data analyzed thus far  
409 (February 28, 2020). A simple pipeline consisting of Multiple Sequence Alignment using Fast  
410 Fourier Transform (MAFFT), snp-sites, and R we calculated 228 single nucleotide  
411 polymorphisms (SNPs) (159 unique) across 145 genomes [45-47]. Each of the 145 WGS

412 contains less than 10 SNPs with the exception of one having 25. None of the variations impact  
413 the diagnostic assay signatures. However, real-time monitoring of these assays against WGS as  
414 they become available, will enable rapid identification of signature erosion if it occurs and  
415 generation of new assays as needed. The newly designed assays we have described here need to  
416 be validated in wet lab testing and with appropriate clinical matrices to determine their  
417 performance. However, we have demonstrated that the BioLaboro pipeline can be used  
418 effectively and rapidly to validate available assays and to design new assays using genome  
419 sequences of newly emerging pathogens.

## 420 **Conclusions**

421 By periodically re-running BioLaboro on emerging and reemerging pathogen sequences  
422 as they become available, over time the relative diversity can be monitored, and assays can be  
423 updated to remain current with regards to available data. By tracking assay performance  
424 measures over time, one can evaluate the efficacy of MCMs on a routine basis. These analyses  
425 would ensure that the most accurate MCMs are available when an outbreak response is  
426 necessary. In this study we demonstrate the value of real-time genomic sequencing and MCM  
427 evaluation to provide actionable information before and during a public health emergency.  
428 Combined with an active biosurveillance of zoonotic reservoirs and generation of sequence data  
429 to understand the genetic diversity of these pathogens, BioLaboro is broadly applicable for  
430 providing effective diagnostics and medical countermeasures during a crisis involving future  
431 threats.

432

433

## 434 **Methods**

### 435 **BioLaboro System Description**

436 BioLaboro is an application for rapidly designing *de novo* assays and validating existing  
437 PCR detection assays. It is composed of three tools: BioVelocity, Primer3, and PSET which are  
438 built into a pipeline for user-friendly new assay discovery via an interactive graphic user  
439 interface.

440 **BioVelocity** is a bioinformatics tool based on an innovative algorithm and approach to  
441 genomic reference indices [32]. Using a fast and accurate hashing algorithm, BioVelocity can  
442 quickly align reads to a large set of references. BioVelocity takes advantage of large RAM  
443 systems (hardware specification described in Additional Table 1) and creates a k-mer index of all  
444 selected reference sequences (e.g. GenBank) by identifying all possible base pair sequences of  
445 various k-mer lengths. This index is used to determine all possible matches between query  
446 sequences and references, simultaneously. The advantage of this approach is that it allows for  
447 rapid identification of sequences conserved within or omitted from a set of target references.  
448 Thus, the used has high confidence in the conserved and signature (unique) designations because  
449 they are not based on heuristics and probabilities.

450 **Primer3** [48] is a tool for designing primers and probes for real-time PCR reactions. It  
451 considers a range of criteria such as oligonucleotide melting temperature, size, GC content, and  
452 primer-dimer possibilities. Potential new primer sets are identified within the signature regions  
453 using Primer3 analysis. For the BioLaboro pipeline, Primer3 has been configured to analyze 22  
454 parameters influencing suitability of a sequence to primer creation and construct viable primers  
455 which cover identified signature regions. These primers are scored with a penalty scoring



456 system to attempt to determine the fitness of the resulting primers thus allowing an end user to  
457 assess which signatures yield the best primers when the signatures themselves may be of  
458 similar size.

459 **PSET** is configured to test PCR assays *in silico* against the latest versions of public  
460 sequence repositories to determine if the primers and probes still match only to their intended  
461 targets. An elaborate description of PSET is provided in ref [32]. As NCBI's database and other  
462 public databases are updated periodically, newly added genomic sequences can reveal where  
463 primers and probes may no longer be functional or where PCR assays may detect previously  
464 un-sequenced near neighbors. Using this information, an assay provider can be better aware of  
465 potential false hits and design new primers when false hits become an issue. PSET is used to  
466 test currently deployed assays as well as new assays designed using BioLaboro's capabilities.

467 The BioLaboro application is composed of a fully functional GUI front-end that allows  
468 users to submit jobs to the back-end bioinformatics pipeline hosted on a dedicated large RAM  
469 system. The system has multi-user capability with discrete logins and a single job queue. The  
470 landing screen, shown in Figure 4, gives the user options for submitting a new job, viewing the  
471 current job queue, checking results from previously completed jobs, and exploring the system  
472 database management and settings.

473 Figure 4. The landing page of BioLaboro.

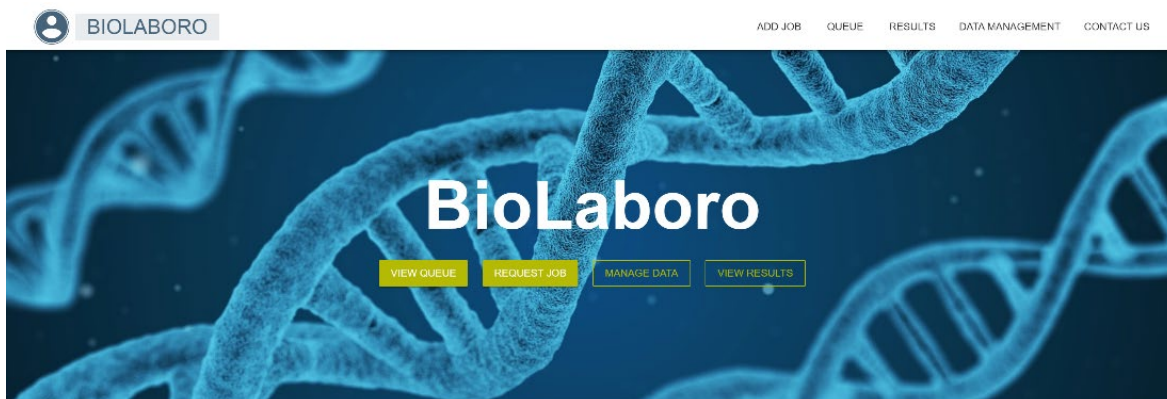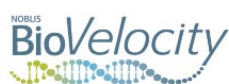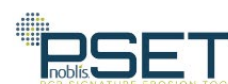

BioLaboro: BETA 1.0.1

Copyright © 2019 Noblis, Inc. All Rights Reserved.

Copyright | Terms of Use | Privacy Policy

Contact the BioLaboro Experts

474

475 The BioLaboro application allows job submissions through a simplified user interface  
476 designed for scientists with minimal or no command-line experience. The user can search for  
477 sequences of interest using the built-in Organism Select tool, Figure 5, which allows for  
478 searching on free text, NCBI Accession number, or NCBI Taxonomy ID. The results can then be  
479 filtered using a “smart filter” which will only include sequences within +/- 10% of the calculated  
480 median genome length of the results. This tool is useful for automatically excluding plasmids or  
481 sequence fragments which can negatively impact signature identification. Alternatively, custom  
482 sequence size filters can also be used if the user wants to target specific plasmids or  
483 chromosomes. Once all sequences are selected and added the user can optionally choose a  
484 specific sequence to serve as the algorithmic reference.

485 Figure 5. The Job Submission page for the BioVelocity component of BioLaboro showing the  
486 BOMV sequences.

The screenshot displays the 'Create New Job' interface in the BioLaboro application. At the top, there is a navigation bar with the BioLaboro logo and menu items: ADD JOB, QUEUE, RESULTS, DATA MANAGEMENT, and CONTACT US. Below the navigation bar, there are four tabs: Signature Discovery (BioVelocity), Score Assay Targets (PSET), Validate Assay (PSET), and New Assay Discovery (BioVelocity -> Primer3 -> PSET). The main content area is titled 'Create New Job' and has a progress indicator with three steps: 1. Select Target Organism, 2. Configure Setting, and 3. Confirm. The current step is 'Organism Select'. A search bar contains the text 'bombali ebola'. Below the search bar, there are three search results in a table:

| <input type="checkbox"/> | Accession  | Name                                                                                                                    | Tax ID  | Species Tax ID | Length |
|--------------------------|------------|-------------------------------------------------------------------------------------------------------------------------|---------|----------------|--------|
| <input type="checkbox"/> | MK340750.1 | Bombali ebolavirus isolate B241, complete genome                                                                        | 2010960 | 2010960        | 19025  |
| <input type="checkbox"/> | MF319186.1 | Bombali ebolavirus isolate Bombali virus/C.pumilus-wt/SLE/2016/Northern Province-PREDICT_SLAB000047, complete genome    | 2010960 | 2010960        | 19043  |
| <input type="checkbox"/> | MF319185.1 | Bombali ebolavirus isolate Bombali virus/M.condylurus-wt/SLE/2016/Northern Province-PREDICT_SLAB000156, complete genome | 2010960 | 2010960        | 19043  |

Below the table, there are buttons for 'SELECT ALL 3', 'CLEAR ALL 0', and a 'Smart Filter' toggle. There is also a 'Filter Median' button and a 'Rows per page' dropdown set to 10. The 'Currently Selected Accessions' section is empty, with the text 'No Organisms have been selected'.

487  
488 BioLaboro employs a queuing system to manage job submissions due to the high computational  
489 requirements of the BioVelocity algorithm. The queue page identifies the currently running job,  
490 the ordered list of queued jobs, and a list of previously finished jobs with timestamps and  
491 completion status, Figure 6. Each finished job can be re-launched from this dialog in the future  
492 with previously used parameters while utilizing the newest available datasets.  
493 Figure 6. The BioLaboro job queue.

The screenshot displays the BioLaboro web interface. At the top, there is a navigation bar with the BioLaboro logo and the text 'BIOLABORO'. To the right of the logo are navigation links: 'ADD JOB', 'QUEUE' (which is highlighted), 'RESULTS', 'DATA MANAGEMENT', and 'CONTACT US'. Below the navigation bar, the main content area is divided into three sections:

- Currently Running Job:** This section has a sub-header 'Currently Running Job' and a refresh icon. Below it is a table with three columns: 'Current Job' (value: 'No job is running...'), 'Job Progress' (value: 'Waiting to start...'), and 'Date Submitted' (value: 'NA').
- Job Queue:** This section has a sub-header 'Job Queue' and an 'ADD NEW JOB' button with a plus icon. Below the header is a table with columns: 'Name', 'Submission Date', 'Message', 'Status', and 'Actions'. The table is currently empty, with a message below it stating 'No jobs in queue. Create a new job to run.'
- Finished Jobs:** This section has a sub-header 'Finished Jobs' and a table with columns: 'Name', 'Submission Date', 'Completion Date', 'Message', 'Status', and 'Actions'. The table contains five rows of example jobs, all with a status of 'SUCCESS'. At the bottom right of this table is a pagination control showing 'Rows per page: 5' and '1-5 of 205'.

At the bottom of the interface, there is a dark blue footer bar containing the following text: 'BioLaboro: BETA 1.0.1', 'Copyright © 2019 Noblis, Inc. All Rights Reserved.', 'Copyright | Terms of Use | Privacy Policy', and 'Contact the BioLaboro Experts'.

494  
495 The queue includes three sections: 1) The currently running job is identified with information on  
496 the current sub-process, 2) The job queue is shown, which can be re-arranged as needed, and 3)  
497 The finished jobs section shows completed jobs with timestamp metadata and an option to re-run  
498 the same job with identical parameters.

499 The Database Management and Settings Page contains many options for maintaining  
500 system data and pipeline settings. BioLaboro's simple user interface design allows the user to  
501 manage the genomic reference databases from within the GUI. The GenBank Repository page,  
502 Figure 7, lists the databases loaded on the system along with the number of sequences each  
503 contains. These databases are used for selecting sequences for signature creation and can be  
504 updated on-demand by submitting a sync job to the queue. Other GenBank databases or custom  
505 sequence databases can also be added and maintained through this entry point.

506 Figure 7. The BioLaboro GenBank Repository located in the Database Management and Settings  
507 page.

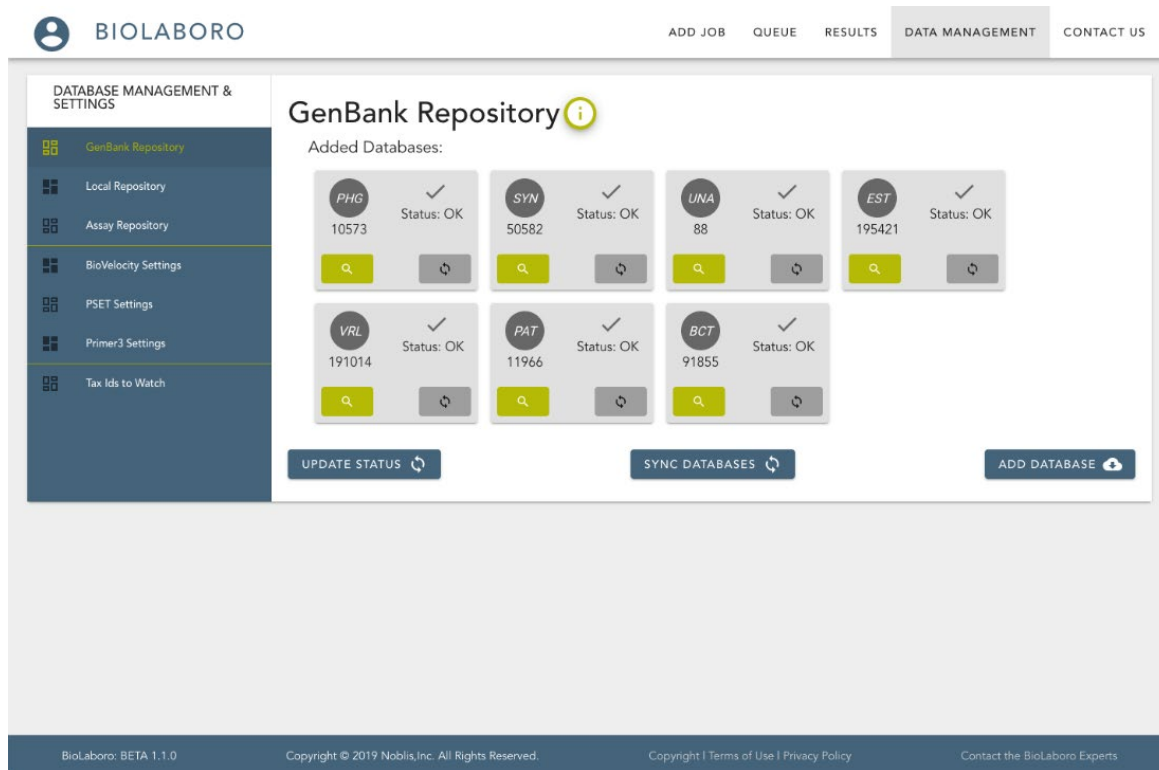

508  
509 PCR detection assays are also maintained in the system and can be viewed and searched  
510 for in the Assay Repository. The system maintains a history of past assay runs so that the user  
511 can track performance of assays over time, as well as re-run assays when new sequences of  
512 interest are available. Lastly the Database and Management Settings page maintains the default  
513 settings for each of the three system tools which can be permanently set here, or specifically  
514 tailored for each job at run-time. Results for completed runs are available from the Results page  
515 which allows the user to view raw data or system generated reports as well as download them to  
516 local copies.

## 517 **Supplementary Information**

518 Additional Table 1. Large RAM System Hardware Specifications.

| <b>Component</b> | <b>Value</b> |
|------------------|--------------|
| Architecture     | ppc64le      |
| RAM              | 1 terabyte   |
| CPUs             | 160          |
| Threads per core | 8            |
| Cores per socket | 5            |
| Sockets          | 4            |
| Local Storage    | 15 terabytes |

519 Additional Table 2. (gisaid\_sequences.xlsx) List of whole genome sequences downloaded from  
520 GISAID and used in this study. The “Signature Creation” column indicates which sequences  
521 were used to generate the signatures, and the “Validation” column indicates which sequences  
522 were used to validate the signatures with PSET.

### 523 **Abbreviations**

524 bp: base pair (bps, plural base pairs)

525 BDBV: Bundibugyo ebolavirus

526 BLAST: Basic Local Alignment Search Tool

527 BOMV: Bombali ebolavirus

528 CFR: Case Fatality Ratio

529 COVID-19: Coronavirus Disease 2019

530 DNA: deoxyribonucleic acid

531 DRC: Democratic Republic of the Congo

532 EBOV: Zaire ebolavirus

533 EMA: European Medicines Agency

534 EVD: Ebola Virus Disease

535 FDA: Food and Drug Administration

536 FN: False Negative  
537 FP: False Positive  
538 GC: guanine cytosine  
539 GP: glycoprotein  
540 GUI: Graphic User interface  
541 ID: identifier  
542 mAb: monoclonal antibody  
543 MAFFT: Multiple Sequence Alignment using Fast Fourier Transform  
544 MCM: medical countermeasure  
545 N: nucleocapsid phosphoprotein  
546 N/A: Not available  
547 NCBI: National Center for Biotechnology Information  
548 NIAID: National Institute of Allergy and Infectious Diseases  
549 NP: nucleoprotein  
550 NPC1: Niemann-Pick C1  
551 ORF: Open Reading Frame  
552 PALM: Pamoja Tulinde Maisha study  
553 PCR: polymerase chain reaction  
554 PSET: PCR signature erosion tool  
555 RAM: random access memory  
556 RESTV: Reston ebolavirus  
557 RNA: ribonucleic acid  
558 rRT-PCR: real-time reverse-transcription polymerase chain reaction  
559 rVSV: recombinant vesicular stomatitis virus  
560 SARS: severe acute respiratory syndrome  
561 SNP: single nucleotide protein  
562 SUDV: Sudan ebolavirus  
563 TAFV: Tai Forest ebolavirus

564 TN: True Negative

565 TP: True Positive

566 WGS: Whole Genome Sequence

567 WHO: World Health Organization

568 **Declarations**

569 **Ethics approval and consent to participate:** Not applicable

570 **Consent for publication:** Not applicable

571 **Availability of data and materials:**

572 Weekly updates of SARS-CoV assay performance using PSET are posted at Viological.org.

573 (<http://virological.org/t/preliminary-in-silico-assessment-of-the-specificity-of-published->

574 [molecular-assays-and-design-of-new-assays-using-the-available-whole-genome-sequences-of-](http://virological.org/t/preliminary-in-silico-assessment-of-the-specificity-of-published-molecular-assays-and-design-of-new-assays-using-the-available-whole-genome-sequences-of-2019-ncov/343/16)

575 [2019-ncov/343/16](http://virological.org/t/preliminary-in-silico-assessment-of-the-specificity-of-published-molecular-assays-and-design-of-new-assays-using-the-available-whole-genome-sequences-of-2019-ncov/343/16)).

576 The datasets analyzed during the current study are available in the following:

577 Three available complete genome sequences of BOMV NCBI Accession numbers: MF319185.1

578 <https://www.ncbi.nlm.nih.gov/nuccore/MF319185.1/>, MF319186.1

579 <https://www.ncbi.nlm.nih.gov/nuccore/MF319186.1>, MK340750.1

580 <https://www.ncbi.nlm.nih.gov/nuccore/MK340750.1>

581 Complete genome sequences of SARS-CoV-2: We gratefully acknowledge the authors,

582 originating and submitting laboratories of the sequences from GISAID's EpiFlu™ Database on

583 which this research is based. <https://www.gisaid.org/>

584 NCBI Taxonomy database: <https://www.ncbi.nlm.nih.gov/taxonomy>

585 EMBL-EBI FASTA GLSEARCH: <https://www.ebi.ac.uk/Tools/sss/fasta/nucleotide.html>

586 **Competing interests:** The authors declare that they have no competing interests.



587 **Funding:** BioLaboro was developed by Noblis with funding received from the Defense  
588 Biological Product Assurance Office of the US Department of Defense under contract number  
589 W911QY-17-C-0016. The funding body did not play any roles in the design of the study and  
590 collection, analysis, and interpretation of data and in writing the manuscript. BioVelocity is a  
591 patented and trademarked tool developed by Noblis exclusively at its private expense. The  
592 research and reports related to the SARS-CoV-2 work also was funded exclusively by Noblis at  
593 its private expense.

594 **Authors' contributions:** MH, DN, SM, SS conceptualized the study. MH, DN, SM, ND, MI, ST  
595 developed BioLaboro. MH, DN, SM, SS analyzed the data. BG provided study resources. MH,  
596 DN, SM, MI, TB, KJ, SS wrote and edited the manuscript.

#### 597 **Acknowledgements**

598 The views expressed in this article are those of the authors and do not necessarily reflect  
599 the official policy or position of the DBPAO, JPEO-CBRND, Department of Defense, the US  
600 Government, nor the institutions or companies affiliated with the authors. BG is a US  
601 Government employee and this work was prepared as part of his official duties. Title 17 of the  
602 United States Code §105 provides that “Copyright protection under this title is not available for  
603 any work of the United States Government.” Title 17 of the United States Code §101 defines a  
604 US Government work as a work prepared by a military service member or employee of the US  
605 Government as part of that person’s official duties. We gratefully acknowledge the Authors and  
606 the Originating and Submitting Laboratories for the SARS-CoV-2 sequences and metadata  
607 shared through GISAID (<https://www.gisaid.org/>) on which SARS-CoV-2 part of this study is  
608 based.

## 609 **References**

- 610 1. Fauci AS, Touchette NA, Folkers GK: **Emerging infectious diseases: a 10-year**  
611 **perspective from the National Institute of Allergy and Infectious Diseases.** *Emerg*  
612 *Infect Dis* 2005, **11**(4):519-525.
- 613 2. Morens DM, Fauci AS: **Emerging infectious diseases: threats to human health and**  
614 **global stability.** *PLoS Pathog* 2013, **9**(7):e1003467.
- 615 3. Paules CI, Eisinger RW, Marston HD, Fauci AS: **What Recent History Has Taught Us**  
616 **About Responding to Emerging Infectious Disease Threats.** *Ann Intern Med* 2017,  
617 **167**(11):805-811.
- 618 4. Fonkwo PN: **Pricing infectious disease. The economic and health implications of**  
619 **infectious diseases.** *EMBO Rep* 2008, **9** Suppl 1:S13-17.
- 620 5. Bloom DE, Black S, Rappuoli R: **Emerging infectious diseases: A proactive approach.**  
621 *Proc Natl Acad Sci U S A* 2017, **114**(16):4055-4059.
- 622 6. World Health Organization: **Coronavirus disease 2019 (COVID-19) Situation Report**  
623 **– 50** [[https://www.who.int/docs/default-source/coronaviruse/situation-reports/20200310-](https://www.who.int/docs/default-source/coronaviruse/situation-reports/20200310-sitrep-50-covid-19.pdf?sfvrsn=55e904fb_2)  
624 [sitrep-50-covid-19.pdf?sfvrsn=55e904fb\\_2](https://www.who.int/docs/default-source/coronaviruse/situation-reports/20200310-sitrep-50-covid-19.pdf?sfvrsn=55e904fb_2)]
- 625 7. GISAID. [<https://www.gisaid.org/epiflu-applications/global-cases-covid-19/>]
- 626 8. Dong E, Du H, Gardner L: **An interactive web-based dashboard to track COVID-19**  
627 **in real time.** *Lancet Infect Dis* 2020.
- 628 9. World Health Organization: **Fact Sheet/Details/Ebola virus disease**  
629 [<https://www.who.int/news-room/fact-sheets/detail/ebola-virus-disease>]

- 630 10. Mari Saez A, Weiss S, Nowak K, Lapeyre V, Zimmermann F, Dux A, Kuhl HS, Kaba M,  
631 Regnaut S, Merkel K *et al*: **Investigating the zoonotic origin of the West African**  
632 **Ebola epidemic**. *EMBO Mol Med* 2015, 7(1):17-23.
- 633 11. World Health Organization: **Situation Report-Ebola Virus Disease- 10 June 2016**.  
634 <https://www.who.int/csr/disease/ebola/situation-reports/archive/en/>.
- 635 12. World Health Organization: **Ebola in the Democratic Republic of Congo- Health**  
636 **Emergency Update** [<https://www.who.int/emergencies/diseases/ebola/drc-2019>].
- 637 13. Mulangu S, Dodd LE, Davey RT, Jr., Tshiani Mbaya O, Prochan M, Mukadi D,  
638 Lusakibanza Manzo M, Nzolo D, Tshomba Oloma A, Ibanda A *et al*: **A Randomized,**  
639 **Controlled Trial of Ebola Virus Disease Therapeutics**. *N Engl J Med* 2019,  
640 **381(24):2293-2303**.
- 641 14. European Medicines Agency: **First Vaccine to protect against Ebola**. In:  
642 *EMA/CHMP/565403/2019*. 2019.
- 643 15. Food and Drug Administration: **First FDA-approved vaccine for the prevention of**  
644 **Ebola virus disease, marking a critical milestone in public health preparedness and**  
645 **response**. In.; 2019. [https://www.fda.gov/news-events/press-announcements/first-fda-](https://www.fda.gov/news-events/press-announcements/first-fda-approved-vaccine-prevention-ebola-virus-disease-marking-critical-milestone-public-health)  
646 [approved- vaccine-prevention-ebola-virus-disease-marking-critical-milestone-public-](https://www.fda.gov/news-events/press-announcements/first-fda-approved-vaccine-prevention-ebola-virus-disease-marking-critical-milestone-public-health)  
647 [health](https://www.fda.gov/news-events/press-announcements/first-fda-approved-vaccine-prevention-ebola-virus-disease-marking-critical-milestone-public-health).
- 648 16. Zawilinska B, Kosz-Vnenchak M: **General introduction into the Ebola virus biology**  
649 **and disease**. *Folia Med Cracov* 2014, **54(3):57-65**.
- 650 17. Baseler L, Chertow DS, Johnson KM, Feldmann H, Morens DM: **The Pathogenesis of**  
651 **Ebola Virus Disease**. *Annu Rev Pathol* 2017, **12:387-418**.

- 652 18. Cantoni D, Hamlet A, Michaelis M, Wass MN, Rossman JS: **Risks Posed by Reston, the**  
653 **Forgotten Ebolavirus.** *mSphere* 2016, **1**(6).
- 654 19. Miranda ME, Miranda NL: **Reston ebolavirus in humans and animals in the**  
655 **Philippines: a review.** *J Infect Dis* 2011, **204 Suppl 3**:S757-760.
- 656 20. Goldstein T, Anthony SJ, Gbakima A, Bird BH, Bangura J, Tremeau-Bravard A,  
657 Belaganahalli MN, Wells HL, Dhanota JK, Liang E *et al*: **The discovery of Bombali**  
658 **virus adds further support for bats as hosts of ebolaviruses.** *Nat Microbiol* 2018,  
659 **3**(10):1084-1089.
- 660 21. Leroy EM, Kumulungui B, Pourrut X, Rouquet P, Hassanin A, Yaba P, Delicat A,  
661 Paweska JT, Gonzalez JP, Swanepoel R: **Fruit bats as reservoirs of Ebola virus.** *Nature*  
662 2005, **438**(7068):575-576.
- 663 22. Heeney JL: **Ebola: Hidden reservoirs.** *Nature* 2015, **527**(7579):453-455.
- 664 23. Leendertz SA, Gogarten JF, Dux A, Calvignac-Spencer S, Leendertz FH: **Assessing the**  
665 **Evidence Supporting Fruit Bats as the Primary Reservoirs for Ebola Viruses.**  
666 *Ecohealth* 2016, **13**(1):18-25.
- 667 24. Olival KJ, Hayman DT: **Filoviruses in bats: current knowledge and future directions.**  
668 *Viruses* 2014, **6**(4):1759-1788.
- 669 25. Pappalardo M, Julia M, Howard MJ, Rossman JS, Michaelis M, Wass MN: **Conserved**  
670 **differences in protein sequence determine the human pathogenicity of Ebolaviruses.**  
671 *Sci Rep* 2016, **6**:23743.
- 672 26. Martell HJ, Masterson SG, McGreig JE, Michaelis M, Wass MN: **Is the Bombali virus**  
673 **pathogenic in humans?** *Bioinformatics* 2019, **35**(19):3553-3558.

- 674 27. World Health Organization: **WHO Director- General’s opening remarks at the media**  
675 **briefing on COVID-19 - 11 March 2020.** In.; 2020.  
676 [https://www.who.int/dg/speeches/detail/who-director-general-s-opening-remarks-at-the-](https://www.who.int/dg/speeches/detail/who-director-general-s-opening-remarks-at-the-media-briefing-on-covid-19---11-march-2020)  
677 [media-briefing-on-covid-19---11-march-2020.](https://www.who.int/dg/speeches/detail/who-director-general-s-opening-remarks-at-the-media-briefing-on-covid-19---11-march-2020)
- 678 28. Huang C, Wang Y, Li X, Ren L, Zhao J, Hu Y, Zhang L, Fan G, Xu J, Gu X *et al*:  
679 **Clinical features of patients infected with 2019 novel coronavirus in Wuhan, China.**  
680 *Lancet* 2020, **395**(10223):497-506.
- 681 29. Zhou P, Yang XL, Wang XG, Hu B, Zhang L, Zhang W, Si HR, Zhu Y, Li B, Huang CL  
682 *et al*: **A pneumonia outbreak associated with a new coronavirus of probable bat**  
683 **origin.** *Nature* 2020.
- 684 30. World Health Organization: **Coronavirus disease 2019 (COVID-19)Situation Report –**  
685 **49** [[https://www.who.int/docs/default-source/coronaviruse/situation-reports/20200309-](https://www.who.int/docs/default-source/coronaviruse/situation-reports/20200309-sitrep-49-covid-19.pdf?sfvrsn=70dabe61_4)  
686 [sitrep-49-covid-19.pdf?sfvrsn=70dabe61\\_4](https://www.who.int/docs/default-source/coronaviruse/situation-reports/20200309-sitrep-49-covid-19.pdf?sfvrsn=70dabe61_4)]
- 687 31. Elbe S, Buckland-Merrett G: **Data, disease and diplomacy: GISAID's innovative**  
688 **contribution to global health.** *Glob Chall* 2017, **1**(1):33-46.
- 689 32. Sozhamannan S, Holland MY, Hall AT, Negron DA, Ivancich M, Koehler JW, Minogue  
690 TD, Campbell CE, Berger WJ, Christopher GW *et al*: **Evaluation of Signature Erosion**  
691 **in Ebola Virus Due to Genomic Drift and Its Impact on the Performance of**  
692 **Diagnostic Assays.** *Viruses* 2015, **7**(6):3130-3154.
- 693 33. Slezak T, Kuczarski T, Ott L, Torres C, Medeiros D, Smith J, Truitt B, Mulakken N,  
694 Lam M, Vitalis E *et al*: **Comparative genomics tools applied to bioterrorism defence.**  
695 *Brief Bioinform* 2003, **4**(2):133-149.

- 696 34. Gardner SN, Lam MW, Smith JR, Torres CL, Slezak TR: **Draft versus finished**  
697 **sequence data for DNA and protein diagnostic signature development.** *Nucleic Acids*  
698 *Res* 2005, **33**(18):5838-5850.
- 699 35. Altschul SF, Gish W, Miller W, Myers EW, Lipman DJ: **Basic local alignment search**  
700 **tool.** *J Mol Biol* 1990, **215**(3):403-410.
- 701 36. Madeira F, Park YM, Lee J, Buso N, Gur T, Madhusoodanan N, Basutkar P, Tivey ARN,  
702 Potter SC, Finn RD *et al*: **The EMBL-EBI search and sequence analysis tools APIs in**  
703 **2019.** *Nucleic Acids Res* 2019, **47**(W1):W636-W641.
- 704 37. Bao Y, Amarasinghe GK, Basler CF, Bavari S, Bukreyev A, Chandran K, Dolnik O, Dye  
705 JM, Ebihara H, Formenty P *et al*: **Implementation of Objective PASC-Derived Taxon**  
706 **Demarcation Criteria for Official Classification of Filoviruses.** *Viruses* 2017, **9**(5).
- 707 38. Zulkower V, and Rosser, S.: **DNA Features Viewer, a sequence annotations**  
708 **formatting and plotting library for Python.** *BioRxiv* 2020.
- 709 39. Patel A, Jernigan DB, nCo VDCDCRT: **Initial Public Health Response and Interim**  
710 **Clinical Guidance for the 2019 Novel Coronavirus Outbreak - United States,**  
711 **December 31, 2019-February 4, 2020.** *MMWR Morb Mortal Wkly Rep* 2020, **69**(5):140-  
712 146.
- 713 40. Corman VM, Landt O, Kaiser M, Molenkamp R, Meijer A, Chu DKW, Bleicker T,  
714 Brunink S, Schneider J, Schmidt ML *et al*: **Detection of 2019 novel coronavirus (2019-**  
715 **nCoV) by real-time RT-PCR.** *Euro Surveill* 2020, **25**(3).
- 716 41. Forbes KM, Webala PW, Jaaskelainen AJ, Abdurahman S, Ogola J, Masika MM, Kivisto  
717 I, Alburkat H, Plyusnin I, Levanov L *et al*: **Bombali Virus in Mops condylurus Bat,**  
718 **Kenya.** *Emerg Infect Dis* 2019, **25**(5).

- 719 42. Karan LS, Makenov MT, Korneev MG, Sacko N, Boumbaly S, Yakovlev SA, Kourouma  
720 K, Bayandin RB, Gladysheva AV, Shipovalov AV *et al*: **Bombali Virus in Mops**  
721 **condylurus Bats, Guinea. *Emerg Infect Dis* 2019, 25(9).**
- 722 43. Gire SK, Goba A, Andersen KG, Sealfon RS, Park DJ, Kanneh L, Jalloh S, Momoh M,  
723 Fullah M, Dudas G *et al*: **Genomic surveillance elucidates Ebola virus origin and**  
724 **transmission during the 2014 outbreak. *Science* 2014, 345(6202):1369-1372.**
- 725 44. Mbala-Kingebeni P, Pratt CB, Wiley MR, Diagne MM, Makiala-Mandanda S, Aziza A,  
726 Di Paola N, Chitty JA, Diop M, Ayoub A *et al*: **2018 Ebola virus disease outbreak in**  
727 **Equateur Province, Democratic Republic of the Congo: a retrospective genomic**  
728 **characterisation. *Lancet Infect Dis* 2019, 19(6):641-647.**
- 729 45. Katoh K, Standley DM: **MAFFT multiple sequence alignment software version 7:**  
730 **improvements in performance and usability. *Mol Biol Evol* 2013, 30(4):772-780.**
- 731 46. Page AJ, Taylor B, Delaney AJ, Soares J, Seemann T, Keane JA, Harris SR: **SNP-sites:**  
732 **rapid efficient extraction of SNPs from multi-FASTA alignments. *Microb Genom***  
733 **2016, 2(4):e000056.**
- 734 47. **R: A language and environment for statistical computing. R Foundation for**  
735 **Statistical Computing, Vienna, Austria. [ <https://www.R-project.org/>]**
- 736 48. Untergasser A, Cutcutache I, Koressaar T, Ye J, Faircloth BC, Remm M, Rozen SG:  
737 **Primer3--new capabilities and interfaces. *Nucleic Acids Res* 2012, 40(15):e115.**
- 738
